# Supplementary material for: Influenza A(H11N2) Virus Detection in Fecal Samples from Adélie (Pygoscelis adeliae) and Chinstrap (Pygoscelis antarcticus) Penguins, Penguin Island, Antarctica
Source: PubMed Central journal article supplement (PMC9603087; doi:10.1128/spectrum.01427-22), 2022-09-19
Supplement: spectrum.01427-22-s0002.pdf [file spectrum.01427-22-s0002.pdf]

## Supplementary Material

**Supplementary Table 1: Datasets of H11N2 gene segments**

| Genes      | Asia | Antarctica | Europe | North<br>America | South<br>America | Total |
|------------|------|------------|--------|------------------|------------------|-------|
| <b>PB2</b> | 13   | 11         | 3      | 90               | 2                | 119   |
| <b>PB1</b> | 13   | 10         | 3      | 90               | 2                | 118   |
| <b>PA</b>  | 13   | 13         | 3      | 30               | 2                | 121   |
| <b>HA</b>  | 13   | 13         | 11     | 85               | 1                | 123   |
| <b>NP</b>  | 13   | 12         | 12     | 90               | 2                | 129   |
| <b>NA</b>  | 13   | 13         | 12     | 86               | 1                | 125   |
| <b>MP</b>  | 13   | 14         | 12     | 88               | 2                | 129   |
| <b>NS</b>  | 13   | 14         | 12     | 88               | 2                | 129   |

*The table details the complete dataset used in the phylogeographic analysis of each of the eight H11N2's gene segments, detailing the absolute frequency of samples originating in different continents.*

**Supplementary Table 2: Estimated nucleotide substitution rate in H11N2 gene segments**

| Gene       | Median | 95% HPD         |
|------------|--------|-----------------|
| <b>PB2</b> | 2.5E-3 | 2.0E-3 - 3.0E-3 |
| <b>PB1</b> | 2.3E-3 | 2.0E-3 - 2.8E-3 |
| <b>PA</b>  | 1.8E-3 | 1.5E-3 - 2.1E-3 |
| <b>HA</b>  | 4.3E-3 | 3.6E-3 - 5.2E-3 |
| <b>NP</b>  | 2.3E-3 | 1.8E-3 - 2.8E-3 |
| <b>NA</b>  | 3.5E-3 | 2.9E-3 - 4.3E-3 |
| <b>MP</b>  | 2.0E-3 | 1.6E-3 - 2.5E-3 |
| <b>NS</b>  | 2.5E-3 | 1.7E-3 - 3.6E-3 |

*The table details the estimated nucleotide substitution rate estimated for each of H11N2's gene segments in an analysis done in Beast 1.10. Values were estimated as part of an uncorrelated log normal molecular clock.*

**Supplementary Table 3: Spatiotemporal emergence of H11N2 Antarctic cluster.**

| Gene       | MRCA I     |             | MRCA II       |      |
|------------|------------|-------------|---------------|------|
|            | $T_{MRCA}$ | 95% HPD     | Location      | PSP  |
| <b>PB2</b> | 2011       | 2010 - 2012 | North America | 1    |
| <b>PB1</b> | 2012       | 2012 - 2013 | North America | 0.35 |
| <b>PA</b>  | 2012       | 2012 - 2013 | North America | 0.94 |
| <b>HA</b>  | 2012       | 2012 - 2013 | Europe        | 0.61 |
| <b>NP</b>  | 2013       | 2012 - 2013 | North America | 0.99 |
| <b>NA</b>  | 2012       | 2012 - 2013 | North America | 0.95 |
| <b>MP</b>  | 2012       | 2011 - 2013 | North America | 0.99 |
| <b>NS</b>  | 2010       | 2007 - 2012 | North America | 0.99 |

*The table details, for each of H11N2's gene segments, the time to the most recent common ancestor ( $T_{MRCA}$ ) of the H11N2 Antarctic cluster inside this continent (MRCA I), as well as the most probable location, and the posterior state probability (PSP) of the first ancestor of the cluster outside the Antarctic continent (MRCA II).  $T_{MRCA}$  were inferred based on the median height of the Antarctic cluster in each run, and it is accompanied by its 95% highest posterior density (HPD) interval.*

### Supplementary Figures

A.

PB2

 $R^2 = 1.7E-01$  /  $p$ -value =  $3.1E-06$  / X-intercept = 1768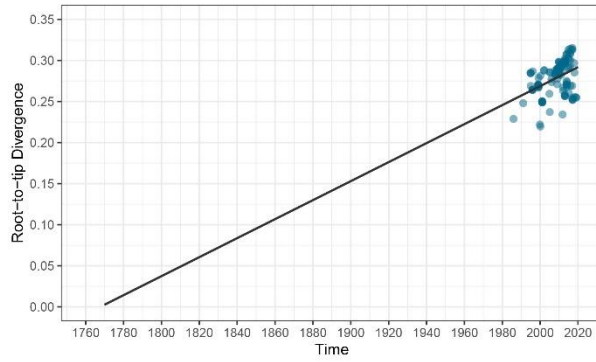

B.

PB1

 $R^2 = 6.9E-1$  /  $p$ -value =  $2.2E-16$  / X-intercept = 1804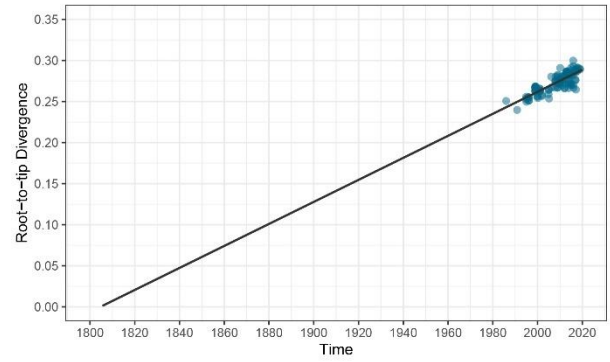

C.

PA

 $R^2 = 1.5E-1$  /  $p$ -value =  $1.46E-05$  / X-intercept = 1924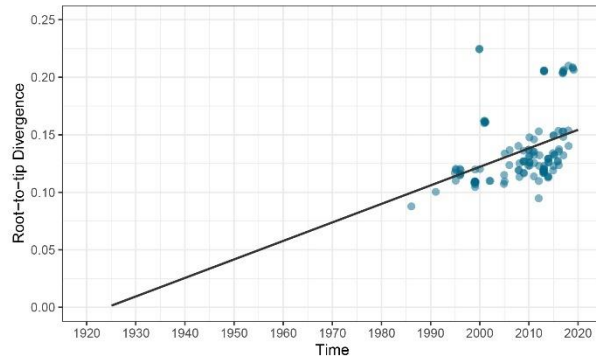

D.

HA

 $R^2 = 2.7E-1$  /  $p$ -value =  $9.0E-10$  / X-intercept = 1994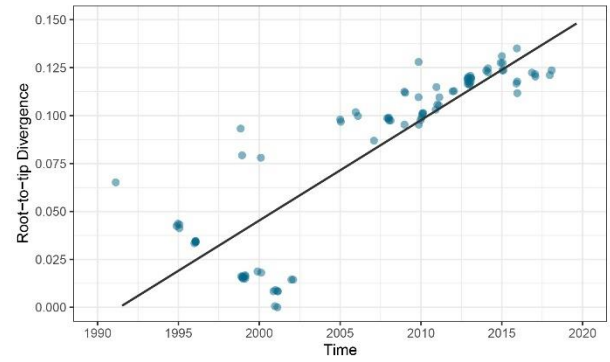

E.

NP

 $R^2 = 9.0E-2$  /  $p$ -value =  $6.2E-4$  / X-intercept = 1967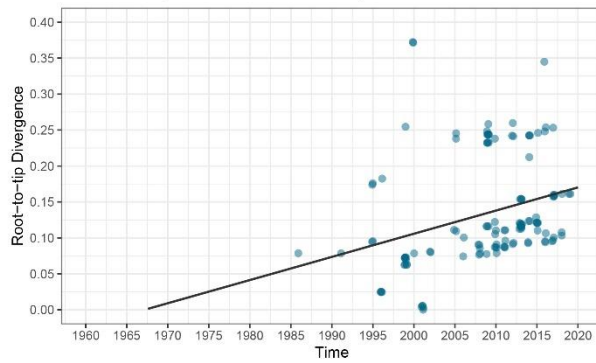

F.

NA

 $R^2 = 6.2E-1$  /  $p$ -value =  $2.2E-16$  / X-intercept = 1990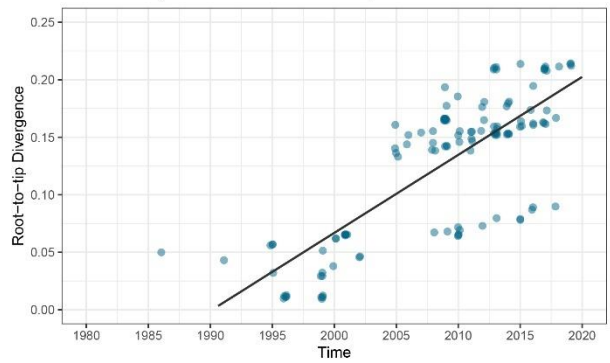

G.

NP

 $R^2 = 2.2E-1$  /  $p$ -value =  $1.5E-08$  / X-intercept = 1914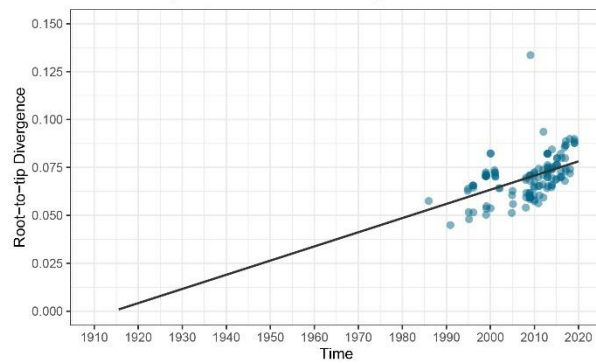

H.

NS

 $R^2 = 3.0E-2$  /  $p$ -value =  $6.0E-2$  / X-intercept = 1030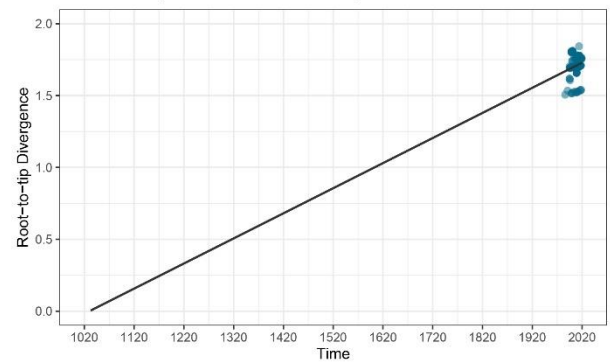

**Supplementary Figure S1: Analysis of the temporal structure of H11N2's gene segments datasets.** The graphs depict linear regressions of the root-to-tip divergence against sampling date observed in the sequences composing the H11N2 gene segments datasets: A) PB2, B) PB1, C) PA, D) HA, E) NP, F) NA, G) GA, and H) HG. The 'best-fitting' root for the phylogeny was found by maximizing the  $R^2$  value of the root-to-tip regression. The X-intercept, the  $R^2$  value, and the  $p$ -value are indicated in each graph.

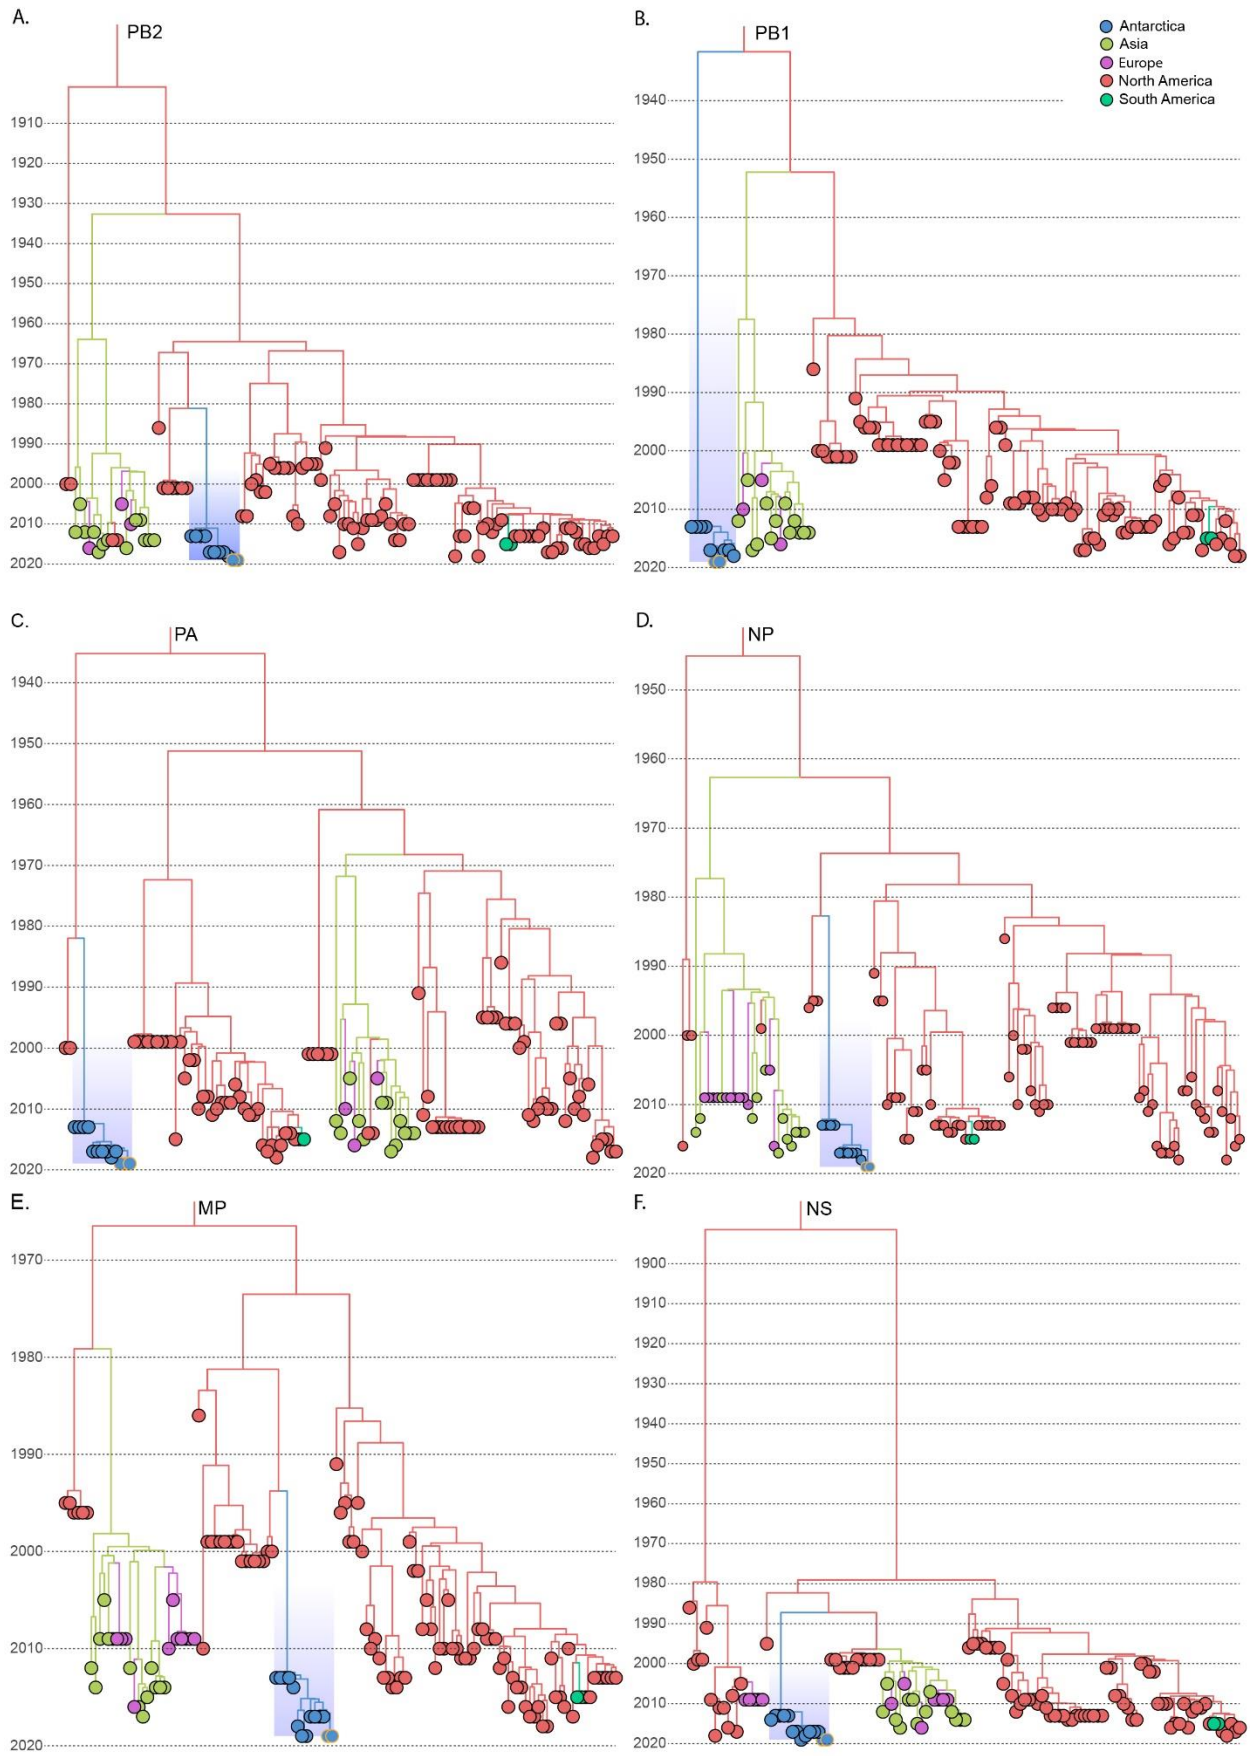

**Supplementary Figure 2: Phylogeographic analysis of the PB2, PB1, PA, NP, MP and NS of the Influenza A H11N2 Antarctic samples** Time-scaled Bayesian maximum clade credibility (MCC) trees of the PB1 (A,  $n = 119$ ), PB2 (B,  $n = 118$ ), PA (C,  $n = 121$ ), NP (D,  $n = 129$ ), MP (E,  $n = 129$ ), and NS (F,  $n = 129$ ) genes. The inherited location of tips and nodes in the trees are represented according to the color code present in the upper right corner of the figure. The Antarctic cluster is highlighted in light blue in all trees. Sequences from this study are highlighted by and orange outline.
